# Supplementary material for: Unscheduled and out-of-hours care for people in their last year of life: a retrospective cohort analysis of national datasets
Source: HighWire-hosted journal article supplement (doi:10.1136/bmjopen-2020-041888), 2020-11-01
Supplement: bmjopen-2020-041888supp004_data_supplement.pdf [file bmjopen-2020-041888supp004_data_supplement.pdf]

|              |               |               |
|--------------|---------------|---------------|
| <b>Total</b> | <b>56,407</b> | <b>100.0%</b> |
|--------------|---------------|---------------|

**Supplementary Table 4.** Number (%) of contacts with services in each of the 12 months before death by patients (18+) in Scotland 2016 ( Month 12 represents the 12<sup>th</sup> month before death)

| Months | Total   |      | Contact NHS 24 |      | Contact PCOOH |      | Call to SAS |      | ED attendance |      | Emergency admissions |      |
|--------|---------|------|----------------|------|---------------|------|-------------|------|---------------|------|----------------------|------|
|        | Number  | %    | Number         | %    | Number        | %    | Number      | %    | Number        | %    | Number               | %    |
| 12     | 18,385  | 3.9  | 4,109          | 4.3  | 3,584         | 3.3  | 3,602       | 3.8  | 3,632         | 4.5  | 3,458                | 3.8  |
| 11     | 19,327  | 4.1  | 4,200          | 4.4  | 3,687         | 3.4  | 3,811       | 4.0  | 3,919         | 4.8  | 3,710                | 4.0  |
| 10     | 19,779  | 4.2  | 4,374          | 4.6  | 3,889         | 3.6  | 3,866       | 4.1  | 3,942         | 4.9  | 3,708                | 4.0  |
| 9      | 21,136  | 4.5  | 4,679          | 4.9  | 3,993         | 3.7  | 4,056       | 4.3  | 4,236         | 5.2  | 4,172                | 4.5  |
| 8      | 22,374  | 4.7  | 4,818          | 5.1  | 4,306         | 3.9  | 4,375       | 4.6  | 4,353         | 5.4  | 4,522                | 4.9  |
| 7      | 24,006  | 5.1  | 5,164          | 5.4  | 4,681         | 4.3  | 4,667       | 4.9  | 4,625         | 5.7  | 4,869                | 5.3  |
| 6      | 25,542  | 5.4  | 5,391          | 5.7  | 5,022         | 4.6  | 5,102       | 5.4  | 4,832         | 6.0  | 5,195                | 5.7  |
| 5      | 28,759  | 6.1  | 5,902          | 6.2  | 5,652         | 5.2  | 5,728       | 6.0  | 5,463         | 6.7  | 6,014                | 6.6  |
| 4      | 33,334  | 7.1  | 6,579          | 6.9  | 6,624         | 6.1  | 6,725       | 7.1  | 6,250         | 7.7  | 7,156                | 7.8  |
| 3      | 41,634  | 8.8  | 7,955          | 8.3  | 8,319         | 7.6  | 8,616       | 9.1  | 7,550         | 9.3  | 9,194                | 10.0 |
| 2      | 56,473  | 12.0 | 10,428         | 10.9 | 11,567        | 10.6 | 11,888      | 12.5 | 9,781         | 12.1 | 12,809               | 14.0 |
| 1      | 161,611 | 34.2 | 31,751         | 33.3 | 47,833        | 43.8 | 32,583      | 34.3 | 22,488        | 27.7 | 26,956               | 29.4 |
| Total  | 472,360 | 100  | 95,350         | 100  | 109,157       | 100  | 95,019      | 100  | 81,071        | 100  | 91,763               | 100  |
